# Supplementary material
Source: publisher site journal article supplement (https://kjim.org/upload/media/kjim-2023-311-Supplementary-Table-2.pdf)
Supplement: Supplementary file 1 [file kjim-2023-311-Supplementary-Table-2.pdf]

**Supplementary Table 2. Full search strategy**

| Database: MEDLINE (PubMed) |                                                                                                                                                                                                             |               |
|----------------------------|-------------------------------------------------------------------------------------------------------------------------------------------------------------------------------------------------------------|---------------|
| No.                        | Search query                                                                                                                                                                                                | Note          |
| #1                         | "Hepatitis B, chronic"[Mesh] OR "Hepatitis B virus"[Mesh]                                                                                                                                                   | P1            |
| #2                         | "Chronic Hepatitis B Virus Infection"[TW] OR "Chronic Hepatitis B"[TW] OR "Hepatitis B Virus Infection, Chronic"[TW] OR "B virus, Hepatitis"[TW] OR "Hepatitis B viruses"[TW] OR "viruses, Hepatitis B"[TW] | P1            |
| #3                         | #1 OR #2                                                                                                                                                                                                    | P OR          |
| #4                         | "Besifovir"[TW]                                                                                                                                                                                             | I1            |
| #5                         | #3 AND #4                                                                                                                                                                                                   | P AND I       |
| #6                         | "Tenofovir"[Mesh]                                                                                                                                                                                           | C1            |
| #7                         | "Tenofovir Disoproxil Fumarate"[TW] OR "Disoproxil Fumarate, Tenofovir"[TW] OR "Fumarate, Tenofovir Disoproxil"[TW] OR "Tenofovir Disoproxil"[TW] OR "Disoproxil, Tenofovir"[TW] OR "Viread"[TW]            |               |
| #8                         | "entecavir"[TW] OR "baraclude"[TW]                                                                                                                                                                          | C2            |
| #9                         | #6 OR #7 OR #8                                                                                                                                                                                              | C OR          |
| #10                        | #5 AND #9                                                                                                                                                                                                   | P AND I AND C |

| Database: EMBASE (Elsevier) |                                                                                                                                                                                                            |         |
|-----------------------------|------------------------------------------------------------------------------------------------------------------------------------------------------------------------------------------------------------|---------|
| No.                         | Search query                                                                                                                                                                                               | Note    |
| #1                          | "chronic hepatitis B"/exp                                                                                                                                                                                  | P1      |
| #2                          | "Hepatitis B virus" OR "Chronic Hepatitis B Virus Infection" OR "Chronic Hepatitis B" OR "Hepatitis B Virus Infection, Chronic" OR "B virus, Hepatitis" OR "Hepatitis B viruses" OR "viruses, Hepatitis B" | P1      |
| #3                          | #1 OR #2                                                                                                                                                                                                   | P OR    |
| #4                          | "besifovir"/exp                                                                                                                                                                                            | I1      |
| #5                          | "tenofovir"/exp OR "tenofovir disoproxil"/exp                                                                                                                                                              | I2      |
| #6                          | "Tenofovir Disoproxil Fumarate" OR "Disoproxil Fumarate, Tenofovir" OR "Fumarate, Tenofovir Disoproxil" OR "Tenofovir Disoproxil" OR "Disoproxil, Tenofovir" OR "Viread"                                   | I2      |
| #7                          | "entecavir"/exp                                                                                                                                                                                            | I3      |
| #8                          | "baraclude" OR "entecabell" OR "entecavir monohydrate"                                                                                                                                                     | I3      |
| #9                          | "tenofovir alafenamide"/exp                                                                                                                                                                                | I4      |
| #10                         | "tenofovir alafenamide fumarate" OR "vemlidy"                                                                                                                                                              | I4      |
| #11                         | #4 OR #5 OR #6 OR #7 OR #8 OR #9 OR #10                                                                                                                                                                    | I OR    |
| #12                         | #3 AND #11                                                                                                                                                                                                 | P AND I |

**Supplementary Table 2. Continued**

| Database: Cochrane Library |                                                                                                                                                                                                                      |         |
|----------------------------|----------------------------------------------------------------------------------------------------------------------------------------------------------------------------------------------------------------------|---------|
| No.                        | Search query                                                                                                                                                                                                         | Note    |
| #1                         | [mh "Hepatitis B, chronic"]                                                                                                                                                                                          | P1      |
| #2                         | "Chronic Hepatitis B Virus Infection":ti,ab,kw OR "Hepatitis B Virus Infection, Chronic":ti,ab,kw OR "Chronic Hepatitis B":ti,ab,kw                                                                                  | P1      |
| #3                         | #1 OR #2                                                                                                                                                                                                             | P OR    |
| #4                         | "besifovir":ti,ab,kw                                                                                                                                                                                                 | I1      |
| #5                         | [mh "tenofovir"]                                                                                                                                                                                                     | I2      |
| #6                         | "Viread":ti,ab,kw OR "Tenofovir Disoproxil":ti,ab,kw OR "Disoproxil Fumarate, Tenofovir":ti,ab,kw OR "Tenofovir Disoproxil Fumarate":ti,ab,kw OR "Tenofovir Disoproxil":ti,ab,kw OR "Disoproxil, Tenofovir":ti,ab,kw | I2      |
| #7                         | "entecavir":ti,ab,kw OR "baraclude":ti,ab,kw OR "entecabell":ti,ab,kw                                                                                                                                                | I3      |
| #8                         | "tenofovir alafenamide":ti,ab,kw OR "tenofovir alafenamide fumarate":ti,ab,kw OR "vemlidy":ti,ab,kw                                                                                                                  | I4      |
| #9                         | #4 OR #5 OR #6 OR #7 OR #8                                                                                                                                                                                           | I OR    |
| #10                        | #3 AND #9                                                                                                                                                                                                            | P AND I |
